# Supplementary material for: Enhanced polymeric lithography resists via sequential infiltration synthesis
Source: Royal Society of Chemistry journal article supplement (doi:10.1039/c1jm12461g), 2011-01-01
Supplement: c1jm12461g.pdf [file c1jm12461g.pdf]

## Supplementary Information for

### Enhanced Polymeric Lithography Resists via Sequential Infiltration Synthesis

Yu-Chih Tseng, Qing Peng, Leonidas E. Ocola, David A. Czaplewski, Jeffrey W. Elam and Seth B. Darling

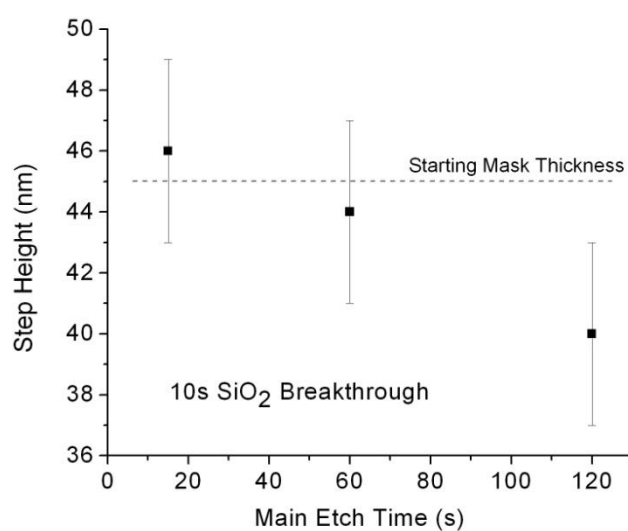

**Figure S1:** Step height of a 500 nm line/space pattern in SIS-PMMA as a function of the time of silicon main etching step. A 10 s SiO<sub>2</sub> breakthrough step was applied prior to silicon etching.

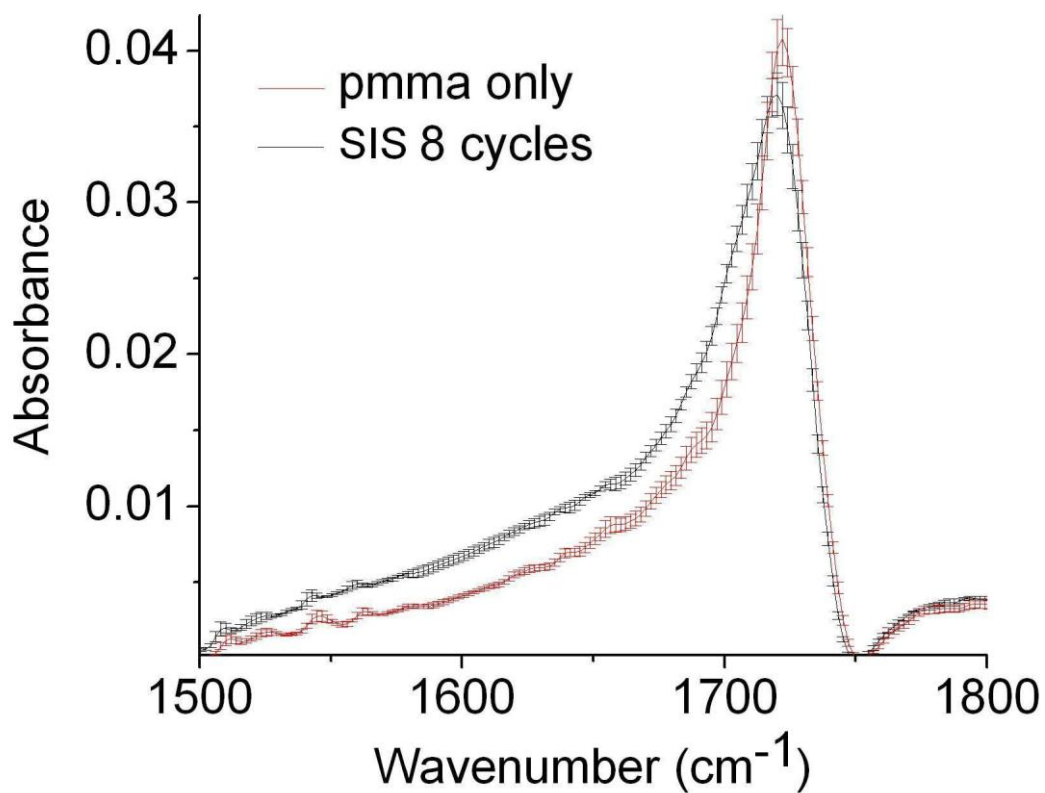

**Figure S2:** FTIR absorption measurements of PMMA before and after SIS (8 cycles). Absorbance peak corresponding to the C=O bond (1720 cm<sup>-1</sup>). The carbonyl vibration is influenced by selective interaction with TMA molecules.
